# Supplementary material
Source: Royal Society of Chemistry journal article supplement (doi:10.1039/d6ta01880g)
Supplement: d6ta01880g1.pdf [file d6ta01880g1.pdf]

## Supporting Information

### Preparation of Polyaniline/Polyurethane Hydrogels for High-performance All-in-one Supercapacitor with Remarkable Pressure-Resistance

*Pu Hou<sup>a,b</sup>, Zishuo Li<sup>a,b</sup>, Jiefei Liu<sup>a,b</sup>, Haoxiang Zhang<sup>a,b</sup>, Dawei Zhang<sup>a,b</sup>, Jidong*

*Dong<sup>a,b</sup>, Jiyou Gu<sup>a,b\*</sup>, Pengfei Huo<sup>a,b\*</sup>*

<sup>a</sup> State Key Laboratory of Woody Oil Resources Utilization, Northeast Forestry University, Harbin, 150040, China

<sup>b</sup> College of Materials Science and Engineering, Northeast Forestry University, Harbin 150040, China

**\*Email: [huopengfei@nefu.edu.cn](mailto:huopengfei@nefu.edu.cn)**

**\*Email: [dldgujy@nefu.edu.cn](mailto:dldgujy@nefu.edu.cn)**

#### Equations

$$i = av^b \tag{S1}$$

where  $I$  and  $v$  are the peak current (mA) and scan rates (mV s<sup>-2</sup>), respectively. Take the logarithm of the formula:  $\log(i) = \log(a) + b\log(v)$ , and the slope obtained by fitting is  $b$  value.

$$\sigma = \frac{L}{R \times A} \tag{S2}$$

where  $L$  (cm),  $R$  ( $\Omega$ ) and  $A$  (cm<sup>2</sup>) are the thickness of hydrogel, bulk resistance and contact area, respectively.

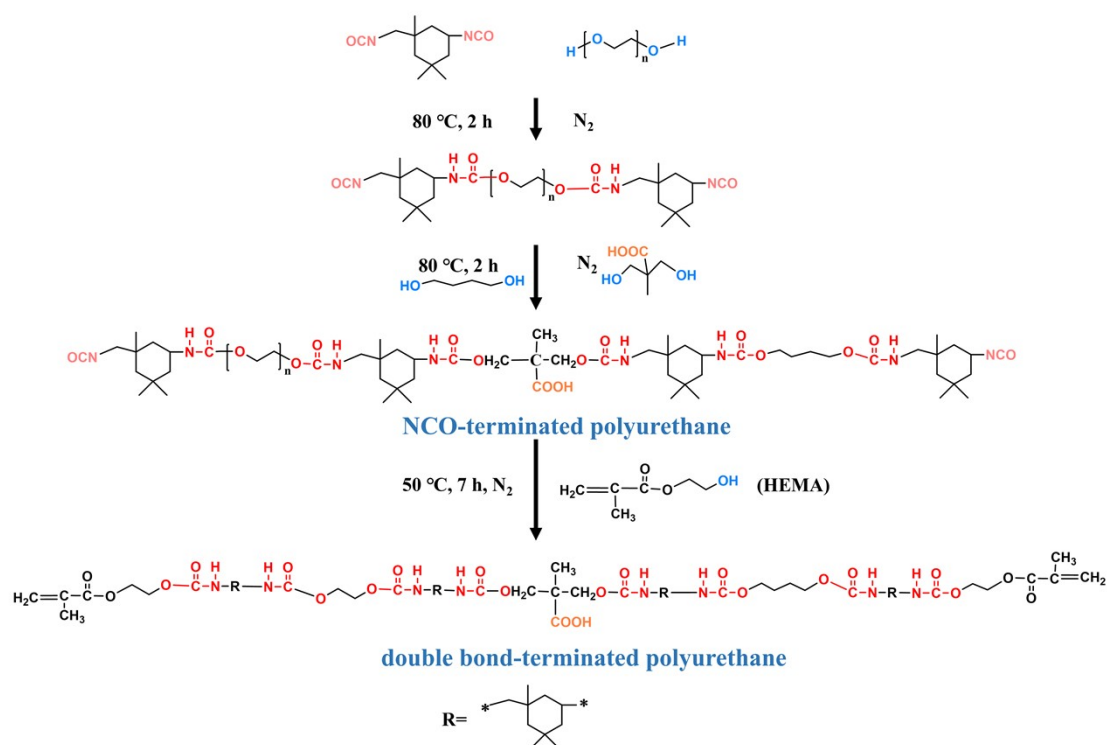

Figure S1. Synthesis of double bond-terminated polyurethane (HPU)

Table S1. The addition amounts of materials of PAM-PU-PAMPS/CA terpolymers

| Sample designation | Composition of PAM-PU-PAMPS/CA terpolymers |         |             |                |        |                          |
|--------------------|--------------------------------------------|---------|-------------|----------------|--------|--------------------------|
|                    | AMPS (g)                                   | HPU (g) | CA (10 wt%) | AIBN (1.0 wt%) | AM (g) | HPU/AMPS/AM (mass ratio) |
| 3A-PU-S/C          | 1.50                                       | 0.50    | 0.05        | 0.035          | 1.5    | 1:3:3                    |
| 4A-PU-S/C          | 1.50                                       | 0.50    | 0.05        | 0.040          | 2.0    | 1:3:4                    |
| 5A-PU-S/C          | 1.50                                       | 0.50    | 0.05        | 0.045          | 2.5    | 1:3:5                    |
| 6A-PU-S/C          | 1.50                                       | 0.50    | 0.05        | 0.051          | 3.0    | 1:3:6                    |

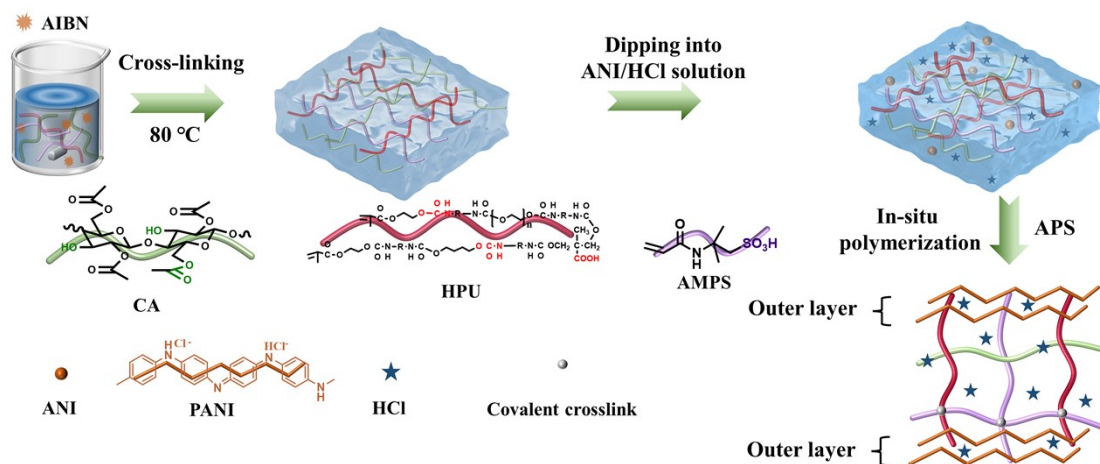

Figure S2. Synthetic pathway of PANI/PU-S/C.

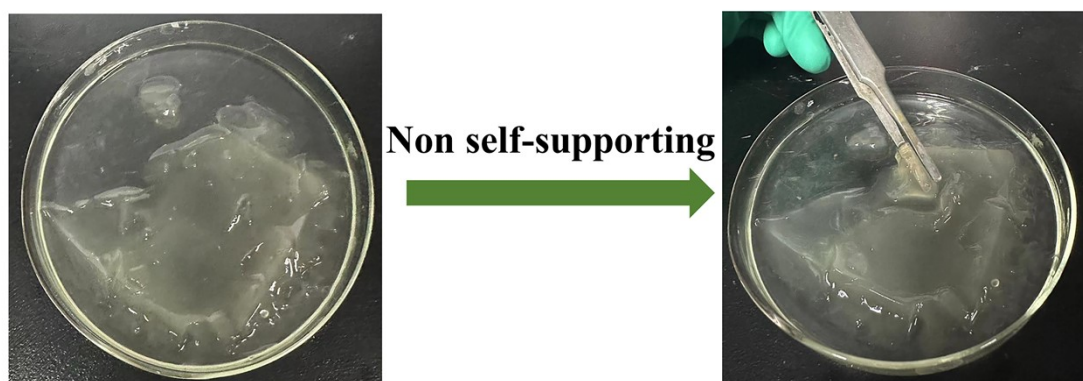

Figure S3. Photograph of over swollen PU-S/C hydrogel.

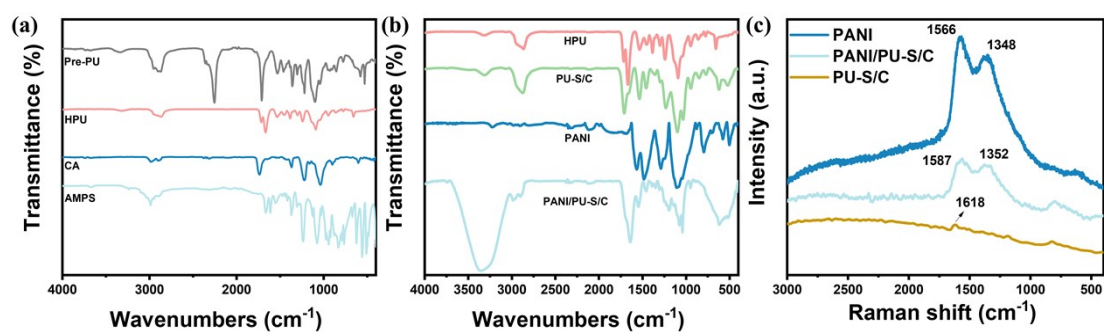

Figure S4. FTIR spectra of (a) Pre-PU, HPU, CA and AMPS monomer; (b) HPU, PU-S/C, PANI/PU-S/C and pure PANI; (c) Raman spectra of pure PANI, A-PU-S/C composite and PANI/PU-S/C.

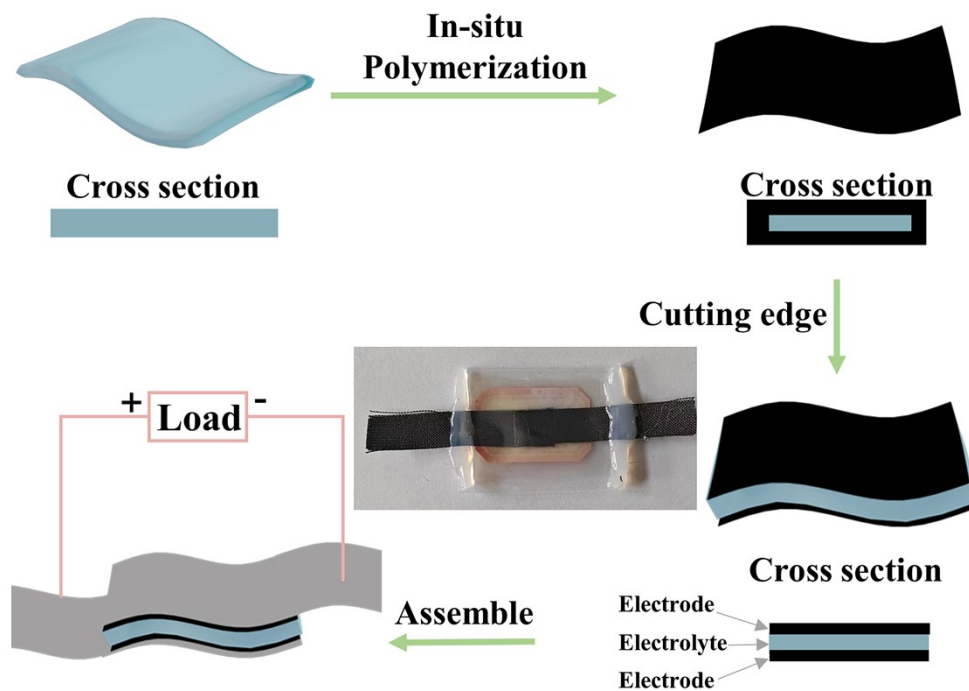

Figure S5. The assembly of PANI/PU-S/C based all-in-one SCs.

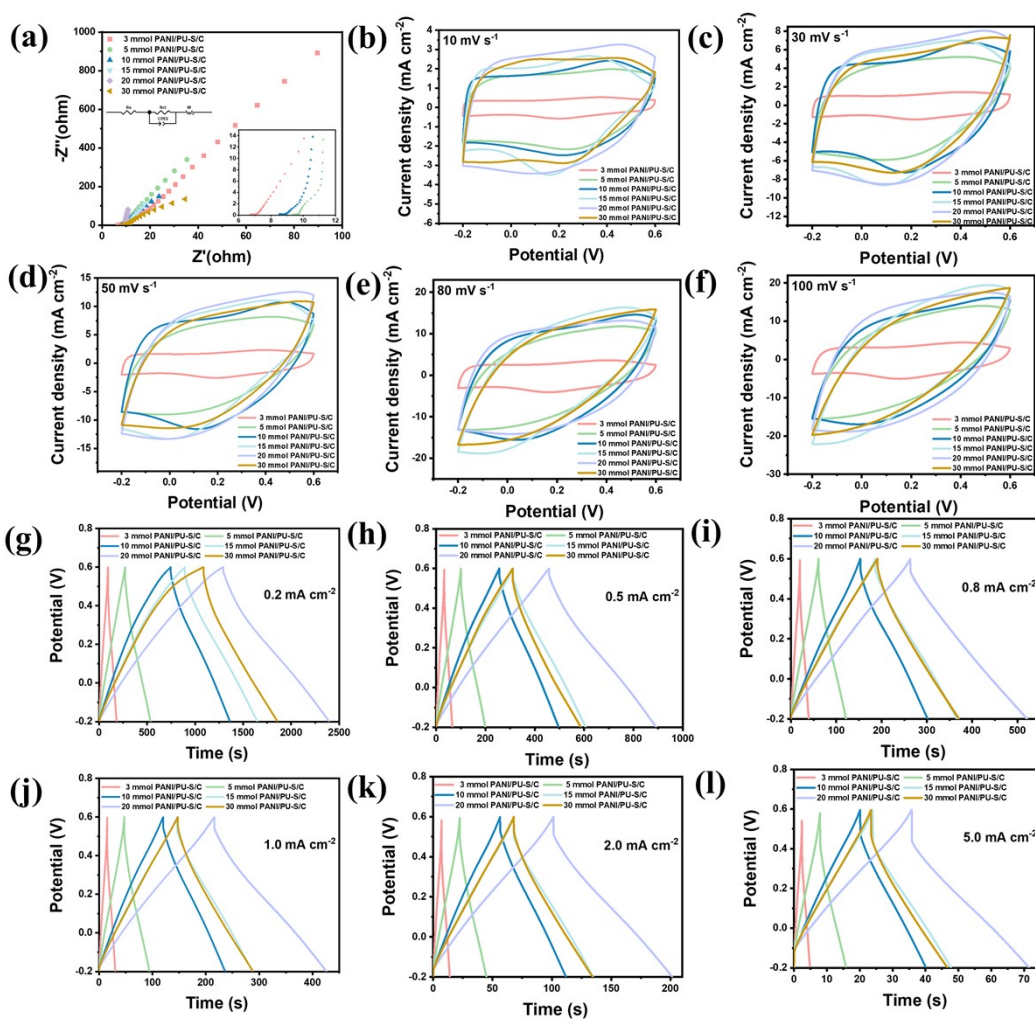

Figure S6. Electrochemical characterization of the PANI/PU-S/C based all-in-one SCs with various aniline concentrations. (a) Nyquist plots of PANI/PU-S/C based all-in-one SCs; (b-f) CV curves of the PANI/PU-S/C based all-in-one SCs at 10-100 mV s<sup>-1</sup>; (g-l) GCD curves of the PANI/PU-S/C based all-in-one SCs at 0.2-5.0 mA cm<sup>-2</sup>.

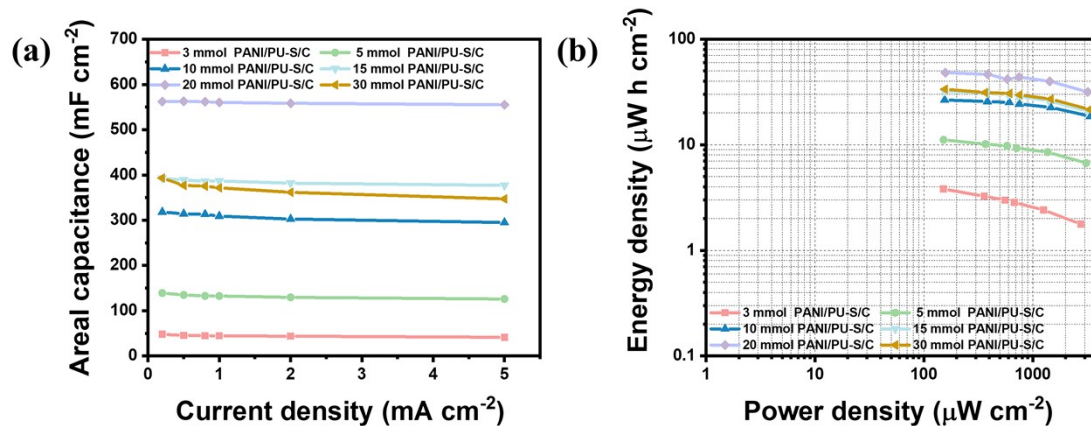

Figure S7. The areal capacitances (a) and the Ragone plots (b) of the PANI/PU-S/C based all-in-one SCs with different content of aniline at different current densities.

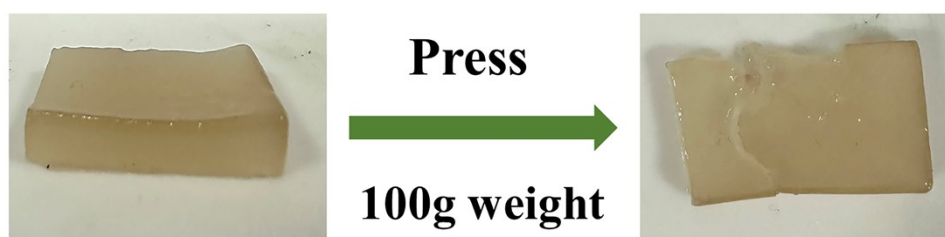

Figure S8. The photographs of PU-S/CA hydrogel before and after being pressed

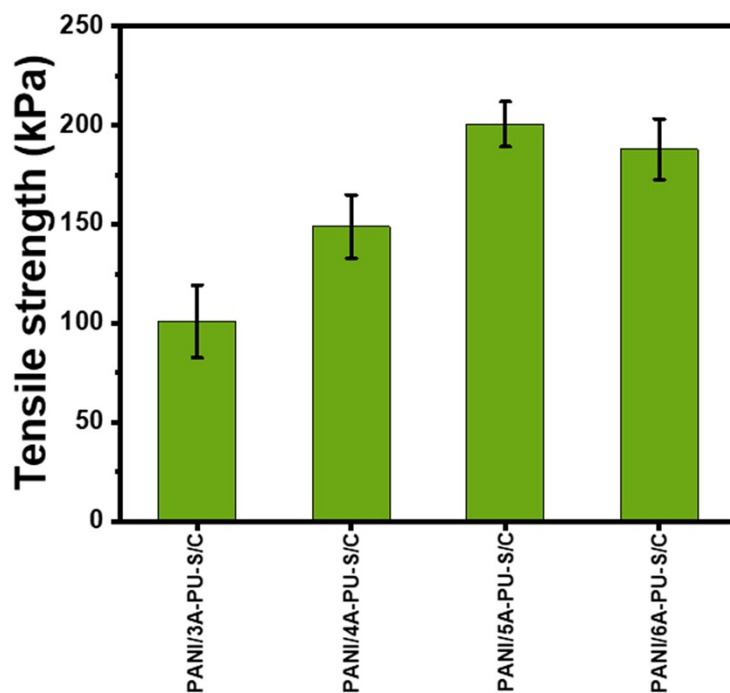

Figure S9. The tensile strength bar chart of PANI/A-PU-S/C-based D-CPH

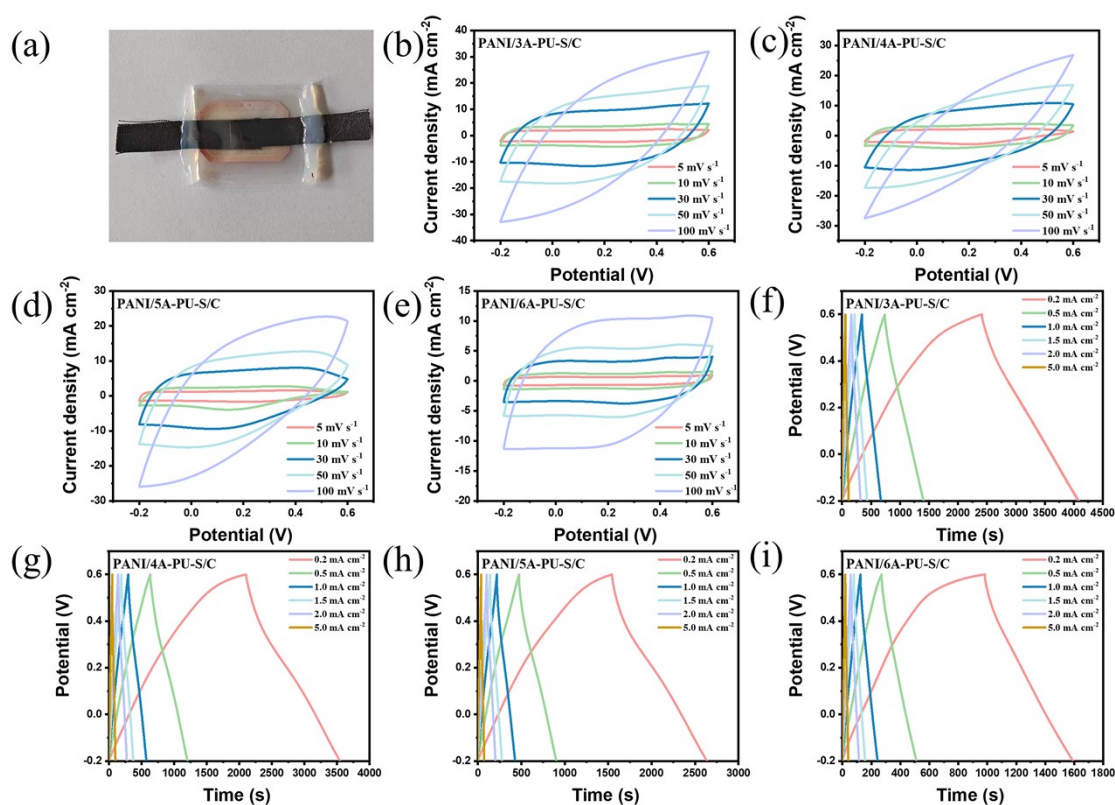

Figure S10. (a) The photograph of assembled PANI/A-PU-S/C based all-in-one SC; (b-e) CV curves of the PANI/A-PU-S/C based all-in-one SCs with different AM contents at scan rates of 5-100  $\text{mV s}^{-1}$ ; (f-i) GCD curves of the PANI/A-PU-S/C based all-in-one SCs with different AM contents at current density of 0.2-5.0  $\text{mA cm}^{-2}$ .

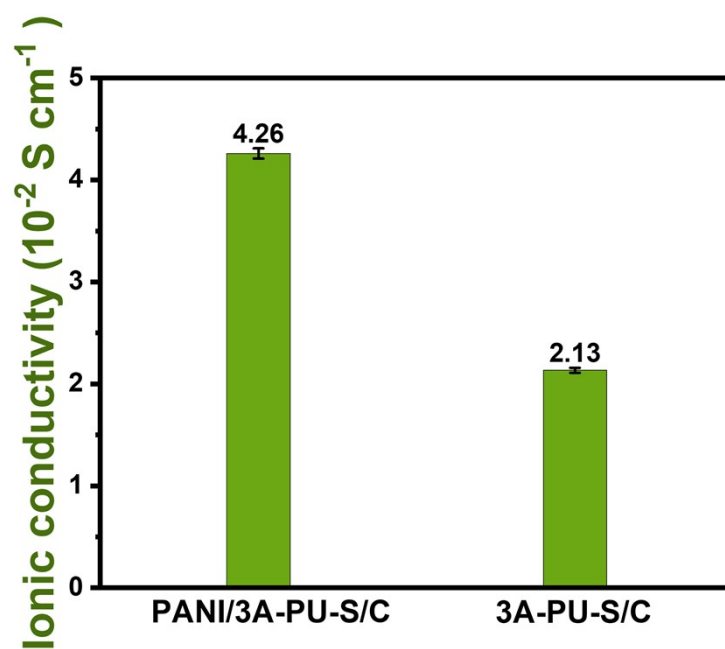

Figure S11. The ionic conductivity of the pure 3A-PU-S/C-based hydrogel and PANI/3A-PU-S/C based CPH.

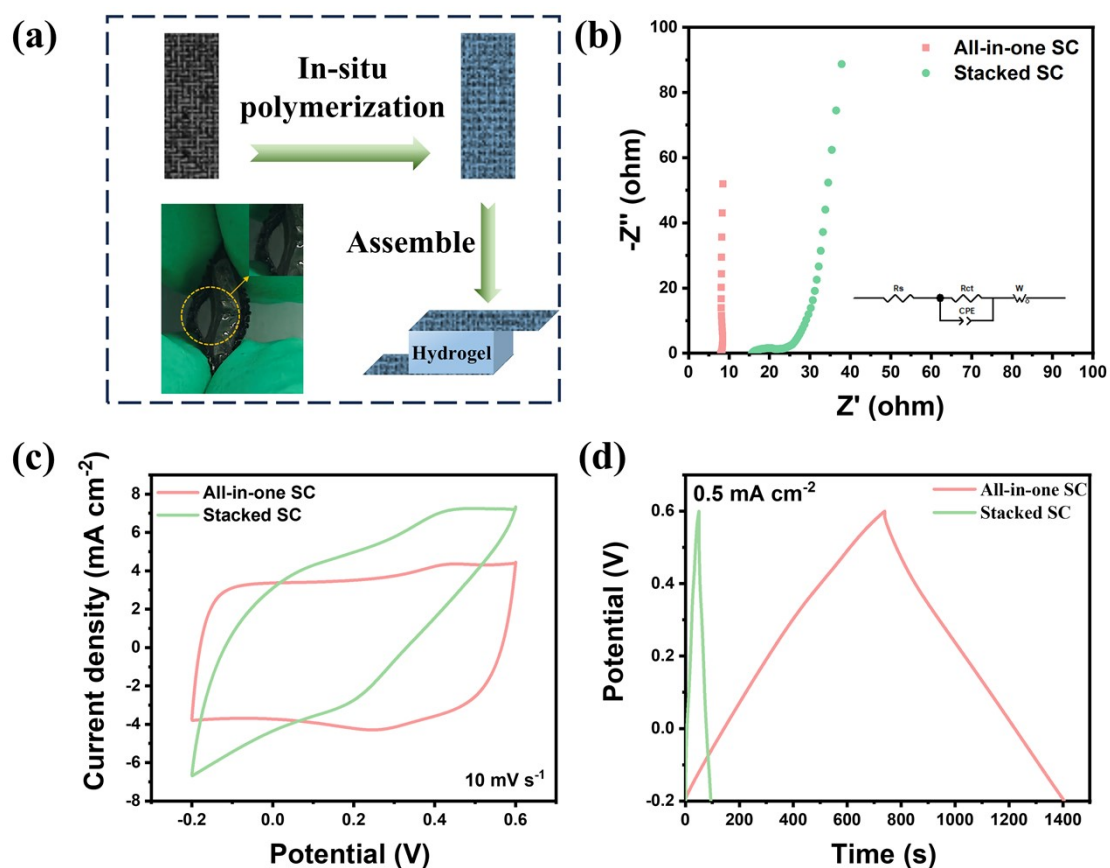

Figure S12. (a) The assembly process of stacked structure supercapacitor using PANI/carbon cloth as electrodes (The illustration is the bent state stacked SC); (b) EIS plots of the all-in-one SC and the stacked SC; (c) CV curves of the all-in-one SC and the stacked SC at scan rate of  $10 \text{ mV s}^{-1}$ ; (d) GCD curves of the all-in-one SC and the stacked SC at current density of  $0.5 \text{ mA cm}^{-2}$ .

Table S2. Comparison of the electrochemical performance of reported advanced CPHs-based supercapacitors with this work.

| Sample                                            | $C_a$ (mF cm <sup>-2</sup> )         | $E_a$ (μW h cm <sup>-2</sup> ) | $P_a$ (μW cm <sup>-2</sup> ) | Ref.         |
|---------------------------------------------------|--------------------------------------|--------------------------------|------------------------------|--------------|
| LS-PEDOT/PAAM/Fe <sup>3+</sup>                    | 672.5<br>(1.0 mA cm <sup>-2</sup> )  | 60                             | 800                          | [3]          |
| Poly (EDOT-co-(Th-g-PAA)-co-ThBA)-PVA             | 335.40 (10<br>mA cm <sup>-2</sup> )  | 19.8                           | -                            | [10]         |
| PHEA-g-PPy                                        | 430 (0.2 mA<br>cm <sup>-2</sup> )    | 38.2<br>29                     | 91.4<br>1371                 | [20]         |
| PPy/PAM/LiCl                                      | 229.8<br>(0.8 mA cm <sup>-2</sup> )  | 20.4<br>16                     | 634.7<br>1600                | [21]         |
| PAM/SA/PLum/Pom                                   | 134.6 (2 mA<br>cm <sup>-2</sup> )    | 33.65                          | 2000                         | [22]         |
| PVA/PHEA/PANI                                     | 98 (0.2 mA<br>cm <sup>-2</sup> )     | 8.48                           | 78.52                        | [28]         |
| PAM-PVA/HACC                                      | 250.75 (0.5<br>mA cm <sup>-2</sup> ) | 23.9                           | 250                          | [30]         |
| P(AM-co-AA)/Trehalose/LiCl                        | 148.2 (0.5<br>mA cm <sup>-2</sup> )  | 20.04                          | 260                          | [37]         |
| PPy/PVP/PAM/LiCl                                  | 308<br>(1.0 mA cm <sup>-2</sup> )    | 21.1                           | 701.4                        | [38]         |
| AQS-PEDOT/PAA/H <sub>2</sub> SO <sub>4</sub> +KCl | 466.5(1.0 mA<br>cm <sup>-2</sup> )   | 41.47                          | 400                          | [39]         |
| PVA/PA-PANI                                       | 356.5 (1.0<br>mA cm <sup>-2</sup> )  | 31.7                           | 800                          | [40]         |
| PAD/H <sub>2</sub> SO <sub>4</sub> -PANI          | 430 (0.5 mA<br>cm <sup>-2</sup> )    | 22                             | 150                          | [41]         |
| P(ANI-co-Py)/ PVA                                 | 317 (1 mA<br>cm <sup>-2</sup> )      | 44                             | 250                          | [42]         |
| Gel/PAAM/PPy                                      | 363.7 (0.5<br>mA cm <sup>-2</sup> )  | 32.33                          | 400                          | [43]         |
| PPy /PVA/KCl                                      | 224 (0.8 mA<br>cm <sup>-2</sup> )    | 20<br>13                       | 600<br>2300                  | [44]         |
| PANI/3A-PU-S/C                                    | 837.53 (5 mA<br>cm <sup>-2</sup> )   | 53.13                          | 3379                         | This<br>work |

Table S3. Comparison of the performance data of previously reported CPH-based all-in-one SCs with this work.

| <b>Conductive polymer matrix</b> | <b>Compressive stress (kPa)</b>  | <b>Compressive strain (%)</b> | <b>Tensile strength (kPa)</b> | <b>Energy density (<math>\mu\text{W h cm}^{-2}</math>)</b> | <b>Power density (<math>\mu\text{W cm}^{-2}</math>)</b> | <b>Ref.</b>  |
|----------------------------------|----------------------------------|-------------------------------|-------------------------------|------------------------------------------------------------|---------------------------------------------------------|--------------|
| PPy/PVA/AA                       | 90                               | 60                            | 173.9                         | 14.9                                                       | 300                                                     | [48]         |
| PPy/CNT/PAA                      | 5000                             | 60                            | 160                           | 0.048                                                      | -                                                       | [49]         |
| PANI/PAM                         | 25                               | 50                            | -                             | 16.4                                                       | 85.4                                                    | [50]         |
| PANI/PAA/O<br>MA                 | 2.5 kg weight                    | -                             | 2200                          | -                                                          | -                                                       | [47]         |
| PANI/PVA-PA                      | -                                | -                             | 5400                          | 7.58                                                       | -                                                       | [51]         |
| PANI/PPHP-<br>Na                 | 221                              | 80                            | 601                           | 34.8                                                       | -                                                       | [52]         |
| PANI/3A-PU-<br>S/C               | Car rolling<br>(~200-<br>300kPa) | -                             | 115.4                         | 53.13                                                      | 3379                                                    | This<br>work |
